# Supplementary material for: Calmodulin Directly Interacts with the Cx43 Carboxyl-Terminus and Cytoplasmic Loop Containing Three ODDD-Linked Mutants (M147T, R148Q, and T154A) that Retain α-Helical Structure, but Exhibit Loss-of-Function and Cellular Trafficking Defects
Source: MDPI journal article supplement (doi:10.3390/biom10101452), 2020-10-17
Supplement: s1 [file s1]

Supplemental Table I. Chemical shift assignments for the  $^{15}\text{N}$ ,  $^{13}\text{C}$ -CaM/Cx43CT complex.

| Residue | $^{15}\text{N}(\text{H}^{\text{N}})$ | $^{13}\text{CO}$ | $\text{C}_{\alpha}(\text{H}^{\alpha})$ | $\text{C}_{\beta}(\text{H}^{\beta})$ | Other Side Chain                                                                                                   |
|---------|--------------------------------------|------------------|----------------------------------------|--------------------------------------|--------------------------------------------------------------------------------------------------------------------|
| A1      |                                      |                  | 51.77(3.99)                            | 19.39(1.43)                          |                                                                                                                    |
| D2      |                                      | 175.64           | 54.72(4.60)                            | 41.32(2.59,2.68)                     |                                                                                                                    |
| Q3      | 120.05(8.39)                         | 175.69           | 55.21                                  | 29.77                                |                                                                                                                    |
| L4      | 123.36(8.34)                         | 177.70           | 54.40(4.59)                            | 43.49(1.41,1.66)                     | $\text{C}^{\gamma}$ , 26.97(1.67); $\text{C}^{\delta 1}$ , 24.51(0.84); $\text{C}^{\delta 2}$ , 26.77(0.88)        |
| T5      | 113.11(8.71)                         | 175.43           | 60.37(4.37)                            | 71.04(4.65)                          | $\text{C}^{\gamma 2}$ , 21.78(1.27)                                                                                |
| E6      | 120.49(9.04)                         | 179.51           | 60.07                                  | 29.19                                |                                                                                                                    |
| E7      | 119.52(8.72)                         | 179.22           | 59.97                                  | 29.02                                |                                                                                                                    |
| Q8      | 120.45(7.72)                         | 178.13           | 58.72                                  | 28.98                                |                                                                                                                    |
| I9      | 119.31(8.35)                         | 177.76           | 66.24(3.56)                            | 37.86(1.85)                          | $\text{C}^{\gamma 1}$ , 30.20(1.72,1.00); $\text{C}^{\gamma 2}$ , 17.33(1.04); $\text{C}^{\delta 1}$ , 12.98(0.77) |
| A10     | 121.13(8.00)                         | 181.03           | 55.06(4.03)                            | 17.76(1.44)                          |                                                                                                                    |
| E11     | 119.79(7.74)                         | 180.32           | 59.11                                  | 29.12                                |                                                                                                                    |
| F12     | 120.08(8.63)                         | 178.80           | 58.87                                  |                                      |                                                                                                                    |
| K13     | 123.59(9.24)                         | 179.23           | 60.07                                  | 31.75                                |                                                                                                                    |
| E14     | 120.35(7.84)                         | 179.61           | 59.45                                  | 29.13                                |                                                                                                                    |
| A15     | 122.36(8.09)                         | 178.96           | 55.40(4.31)                            | 18.14(1.86)                          |                                                                                                                    |
| F16     | 118.8(8.7)                           | 177.68           | 61.78(3.22)                            | 39.57(3.08,3.31)                     |                                                                                                                    |
| S17     | 113.30(8.08)                         | 174.56           | 61.43(4.00)                            | 63.22(3.94,3.94)                     |                                                                                                                    |
| L18     | 121.05(7.29)                         |                  | 57.09                                  |                                      |                                                                                                                    |
| F19     |                                      | 176.91           | 59.19                                  | 41.25                                |                                                                                                                    |
| D20     | 117.49(7.89)                         | 177.25           | 52.46(4.47)                            | 39.06(1.43,2.25)                     |                                                                                                                    |
| K21     | 124.40(7.76)                         | 178.14           | 58.52                                  | 32.47                                |                                                                                                                    |
| D22     | 114.00(8.00)                         | 177.68           | 52.70                                  | 39.39                                |                                                                                                                    |
| G23     | 109.37(7.67)                         | 175.17           | 47.11(3.77,3.77)                       |                                      |                                                                                                                    |
| D24     | 120.83(8.45)                         | 177.43           | 53.52                                  | 40.42                                |                                                                                                                    |
| G25     | 112.90(10.52)                        | 173.79           | 45.38(4.28,3.63)                       |                                      |                                                                                                                    |
| T26     | 112.32(8.17)                         | 173.06           | 59.57(5.34)                            | 72.73(3.76)                          | $\text{C}^{\gamma 2}$ , 22.10(0.96)                                                                                |
| I27     | 126.67(9.87)                         | 176.02           | 60.88(4.78)                            | 39.80(1.60)                          | $\text{C}^{\gamma 1}$ , 26.81(1.05,0.10); $\text{C}^{\gamma 2}$ , 17.46(0.77); $\text{C}^{\delta 1}$ , 15.34(0.16) |
| T28     | 116.43(8.37)                         | 176.67           | 59.31(4.74)                            | 72.46(4.74)                          | $\text{C}^{\gamma 2}$ , 21.71(1.24)                                                                                |
| T29     | 112.43(9.26)                         | 177.39           | 66.30(3.71)                            | 67.77(4.14)                          | $\text{C}^{\gamma 2}$ , 23.26(1.20)                                                                                |
| K30     | 121.27(7.61)                         | 179.91           | 59.17                                  | 32.41                                |                                                                                                                    |
| E31     | 122.08(7.78)                         | 179.38           | 59.32                                  | 32.35?                               |                                                                                                                    |
| L32     | 120.08(8.63)                         | 179.03           | 58.36                                  | 42.62                                |                                                                                                                    |
| G33     | 105.74(8.75)                         | 175.16           | 48.20(3.90,3.52)                       |                                      |                                                                                                                    |
| T34     | 118.57(8.13)                         | 177.20           | 67.04(3.86)                            | 68.76(4.27)                          | $\text{C}^{\gamma 2}$ , 21.34(1.19)                                                                                |
| V35E31  | 121.85(7.52)                         | 179.58           | 66.65(3.38)                            |                                      | $\text{C}^{\gamma 1}$ , 20.39(0.45); $\text{C}^{\gamma 2}$ , 22.63(0.60);                                          |

|     |               |         |                  |                  |                                                                                               |
|-----|---------------|---------|------------------|------------------|-----------------------------------------------------------------------------------------------|
| M36 |               |         |                  |                  |                                                                                               |
| R37 |               | 181.44  | 59.11            | 29.92            |                                                                                               |
| S38 | 119.17(7.94)  | 175.02  | 61.63(4.30)      | 62.63(4.01,3.95) |                                                                                               |
| L39 | 120.34(7.38)  | 177.10  | 54.76            | 42.04            |                                                                                               |
| G40 | 106.34(7.86)  | 174.35  | 45.41            |                  |                                                                                               |
| Q41 | 118.19(7.78)  | 174.21  | 54.25            | 30.31            |                                                                                               |
| N42 | 116.40(8.77)  | 171.92  | 51.23            | 39.24            |                                                                                               |
| P43 |               | 177.77  | 62.36(4.68)      | 31.80(2.15,1.85) | $C^{\gamma}$ , 29.73(2.00,1.89); $C^{\delta}$ , 49.86(3.55,3.18)                              |
| T44 | 113.15(8.80)  | 175.16  | 60.38            | 70.95            |                                                                                               |
| E45 | 120.74(8.82)  | 178.96  | 59.93            | 28.86            |                                                                                               |
| A46 | 120.81(8.28)  | 180.22  | 55.06(4.03)      | 18.11(1.31)      |                                                                                               |
| E47 | 118.74(7.71)  | 180.22? | 59.07            | 29.55            |                                                                                               |
| L48 |               | 178.64  | 57.78            | 42.48            |                                                                                               |
| Q49 | 118.54(8.30)  | 178.52  | 58.48            | 28.12            |                                                                                               |
| D50 | 120.44(8.11)  | 178.75  | 57.67            | 40.15            |                                                                                               |
| M51 | 119.30(7.79)  | 179.05  | 59.27            | 33.43            |                                                                                               |
| I52 | 118.12(8.00)  | 178.12  | 64.06(3.48)      | 36.87(1.93)      | $C^{\gamma^1}$ , 28.08(1.47,1.22); $C^{\gamma^2}$ , 16.17(0.63); $C^{\delta^1}$ , 12.13(0.62) |
| N53 | 118.40(8.70)  | 177.28  | 55.72            | 37.97            |                                                                                               |
| E54 | 116.13(7.45)  | 177.29  | 58.74            | 30.28            |                                                                                               |
| V55 |               | 175.65  | 60.66            | 32.99            |                                                                                               |
| D56 | 121.15(7.75)  | 175.91  | 53.77            | 40.68            |                                                                                               |
| A57 | 131.66(8.29)  | 178.69  | 54.16(4.15)      | 19.66(1.46)      |                                                                                               |
| D58 | 114.15(8.22)  | 177.78  | 52.81            | 39.71            |                                                                                               |
| G59 | 108.69(7.61)  | 174.97  | 47.09(3.81,3.71) |                  |                                                                                               |
| N60 | 118.75(8.16)  | 176.87  | 52.59            | 37.55            |                                                                                               |
| G61 | 113.30(10.54) | 173.28  | 45.58(4.17,3.41) |                  |                                                                                               |
| T62 | 108.61(7.65)  | 173.26  | 59.41            | 72.25(3.94)      | $C^{\gamma^2}$ , 22.52(1.05)                                                                  |
| I63 | 123.29(8.74)  | 175.61  | 59.90(5.06)      | 40.04(1.93)      | $C^{\gamma^1}$ , . (1.50,1.18); $C^{\gamma^2}$ , 18.51(1.19); $C^{\delta^1}$ , 13.64(0.74)    |
| D64 | 128.33(8.94)  | 176.21  | 51.99(5.40)      | 42.07(2.77,3.04) |                                                                                               |
| F65 | 118.78(9.00)  | 173.63  | 63.25            | 36.11            |                                                                                               |
| P66 |               |         | 66.72(3.82)      | 30.67(2.16,1.89) | $C^{\gamma}$ , .(.,.); $C^{\delta}$ , 49.02(3.69,3.69)                                        |
| E67 |               | 179.33  | 59.14            |                  |                                                                                               |
| F68 | 123.99(8.80)  |         | 61.48            |                  |                                                                                               |
| L69 |               |         |                  |                  |                                                                                               |
| T70 |               |         | 66.30(3.71)      | 68.47(4.18)      | $C^{\gamma^2}$ , 21.78(1.13)                                                                  |
| M71 |               |         |                  |                  |                                                                                               |
| M72 | 117.4(7.95)   |         |                  |                  |                                                                                               |

|      |               |        |                  |                  |                                                                                               |
|------|---------------|--------|------------------|------------------|-----------------------------------------------------------------------------------------------|
| A73  |               |        | 55.08(3.97)      | 18.26(1.35)      |                                                                                               |
| R74  | 116.5(7.5)    |        |                  |                  |                                                                                               |
| K75  |               |        |                  |                  |                                                                                               |
| M76  |               |        |                  |                  |                                                                                               |
| K77  |               |        |                  |                  |                                                                                               |
| D78  |               | 176.67 | 54.37(4.62)      | 41.32(2.59,2.68) |                                                                                               |
| T79  | 114.05(7.99)  |        |                  |                  |                                                                                               |
| D80  |               |        |                  |                  |                                                                                               |
| S81  |               |        | 58.73(4.39)      | 63.75(3.97,3.89) |                                                                                               |
| E82  |               | 178.52 | 59.34            | 29.60            |                                                                                               |
| E83  |               |        |                  |                  |                                                                                               |
| E84  | 118.5(8.1)    | 178.94 | 59.16            | 29.10            |                                                                                               |
| I85  | 121.73(8.08)  | 177.96 | 65.19(3.86)      | 37.32(2.09)      | $C^{\gamma^1}$ , 30.02(1.77,1.77); $C^{\gamma^2}$ , 19.06(1.02); $C^{\delta^1}$ , 13.30(0.70) |
| R86  | 121.74(8.43)  |        | 60.02            | 29.79            |                                                                                               |
| E87  | 119(8.35)     | 179.86 | 59.16            | 29.10            |                                                                                               |
| A88  | 121.73(8.08)  |        | 55.29(4.05)      | 18.05(1.68)      |                                                                                               |
| F89  |               |        | 62.25(3.02)      | 38.90(2.92,3.14) |                                                                                               |
| R90  |               | 177.78 |                  |                  |                                                                                               |
| V91  | 117.61(7.41)  |        |                  |                  |                                                                                               |
| F92  |               |        |                  |                  |                                                                                               |
| D93  |               | 177.47 | 52.68(4.51)      | 39.06(1.43,2.25) |                                                                                               |
| K94  | 125.89(7.62)  | 178.18 | 59.26            | 32.90            |                                                                                               |
| D95  | 113.93(8.21)  | 177.78 | 52.81            | 39.71            |                                                                                               |
| G96  | 109.56(7.85)  | 175.13 | 47.11(3.77,3.77) |                  |                                                                                               |
| N97  | 119.78(8.33)  | 176.05 | 52.64            | 37.92            |                                                                                               |
| G98  | 113.18(10.72) | 172.45 | 44.97(3.97,3.34) |                  |                                                                                               |
| Y99  | 116.06(7.61)  | 174.52 | 55.99            | 43.08)           |                                                                                               |
| I100 | 127.38(10.15) | 175.51 | 60.69(4.71)      | 38.87(1.76)      | $C^{\gamma^1}$ , 26.83(1.16,0.15); $C^{\gamma^2}$ , 17.60(0.89); $C^{\delta^1}$ , 15.96(0.22) |
| S101 | 123.89(8.95)  | 175.25 | 55.70(4.78)      | 66.56(4.36,3.90) |                                                                                               |
| A102 | 123.13(9.25)  | 179.29 | 55.93(3.84)      | 17.91(1.40)      |                                                                                               |
| A103 | 118.35(8.27)  | 181.52 | 54.82(3.97)      | 18.00(1.35)      |                                                                                               |
| E104 | 120.33(7.92)  |        | 59.58            |                  |                                                                                               |
| L105 |               |        |                  |                  |                                                                                               |
| R106 |               |        |                  |                  |                                                                                               |
| H107 |               |        |                  |                  |                                                                                               |
| V108 |               |        |                  |                  |                                                                                               |
| M109 |               |        |                  |                  |                                                                                               |

|      |               |        |                  |             |                                                                                               |
|------|---------------|--------|------------------|-------------|-----------------------------------------------------------------------------------------------|
| T110 |               |        |                  |             |                                                                                               |
| N111 | 121.15(7.75)  |        |                  |             |                                                                                               |
| L112 |               | 176.42 |                  |             |                                                                                               |
| G113 | 106.17(7.69)  | 174.33 | 45.24(4.19,3.71) |             |                                                                                               |
| E114 |               |        |                  |             |                                                                                               |
| K115 | 123.5(8.6)    | 175.72 | 56.14            |             |                                                                                               |
| L116 | 125.52(8.15)  | 117.97 | 53.76            | 45.10       |                                                                                               |
| T117 | 114.77(9.27)  | 175.44 | 60.37(4.37)      | 71.04(4.65) | $C^{\gamma^2}$ , 21.71(1.24)                                                                  |
| D118 | 121.10(8.92)  | 178.61 | 57.99            | 39.65       |                                                                                               |
| E119 | 119.10(8.66)  | 179.20 | 59.95            | 28.98       |                                                                                               |
| E120 | 120.53(7.78)  | 179.90 | 59.27            | 30.66       |                                                                                               |
| V121 | 120.18(8.10)  |        | 67.01(3.48)      | 31.45(2.15) | $C^{\gamma^1}$ , 22.10(0.96); $C^{\gamma^2}$ , 23.93(0.89);                                   |
| D122 |               | 179.18 | 57.57            | 40.60       |                                                                                               |
| E123 | 119.47(8.06)  | 178.79 | 59.14            | 29.45       |                                                                                               |
| M124 | 120.3(8.3)    | 179.13 | 59.20            | 33.60       |                                                                                               |
| I125 | 118.15(7.71)  | 177.15 | 63.83(3.40)      | 36.17(2.04) | $C^{\gamma^1}$ , 28.08(1.47,1.22); $C^{\gamma^2}$ , 16.17(0.63); $C^{\delta^1}$ , 10.69(0.63) |
| R126 | 118.16(8.20)  | 179.33 | 59.65            | 30.10       |                                                                                               |
| E127 | 116.08(7.93)  | 177.31 | 58.56            | 29.78       |                                                                                               |
| A128 | 118.77(7.39)  | 177.97 | 52.07(4.34)      | 21.17(1.35) |                                                                                               |
| D129 | 117.47(7.93)  | 176.04 | 54.02            | 40.34       |                                                                                               |
| I130 | 127.92(8.39)  | 177.87 | 63.25(3.83)      | 38.51(1.92) | $C^{\gamma^1}$ , 27.86(1.61,1.25); $C^{\gamma^2}$ , 17.26(0.87); $C^{\delta^1}$ , 12.18(0.81) |
| D131 | 116.60(8.28)  | 178.27 | 53.69            | 39.87       |                                                                                               |
| G132 | 108.57(7.57)  | 175.30 | 47.51(3.90,3.74) |             |                                                                                               |
| D133 | 120.84(8.32)  | 177.59 | 53.52            | 40.23       |                                                                                               |
| G134 | 113.02(10.39) | 172.82 | 45.67(3.95,3.34) |             |                                                                                               |
| Q135 | 115.39(7.97)  | 174.69 | 53.07            | 32.16       |                                                                                               |
| V136 | 125.41(9.14)  | 175.84 | 61.68(5.11)      | 33.60(2.21) | $C^{\gamma^1}$ , 21.85(1.20); $C^{\gamma^2}$ , 22.30(0.81);                                   |
| N137 | 129.17(9.52)  | 174.90 | 51.23            | 38.13       |                                                                                               |
| Y138 | 118.55(8.45)  | 176.08 | 62.72            | 37.64       |                                                                                               |
| E139 | 118.57(8.13)  | 180.60 | 60.29            | 28.81       |                                                                                               |
| E140 | 119.83(8.77)  | 179.41 | 58.38            | 29.75       |                                                                                               |
| F141 | 124.78(8.90)  | 176.80 | 61.59            | 39.92       |                                                                                               |
| V142 | 119.42(8.58)  | 179.60 | 67.06(3.03)      | 31.58(1.78) | $C^{\gamma^1}$ , 21.20(0.66); $C^{\gamma^2}$ , 22.90(0.42);                                   |
| Q143 | 118.36(7.47)  | 177.93 | 58.79            | 28.01       |                                                                                               |
| M144 | 119.07(7.86)  | 177.87 | 58.41            | 32.99       |                                                                                               |
| M145 | 114.03(7.74)  | 177.04 | 55.36            | 32.36       |                                                                                               |
| T146 | 110.60(7.53)  | 174.16 | 62.14(4.23)      | 70.34(4.15) | $C^{\gamma^2}$ , 21.28(1.08)                                                                  |

|      |              |        |             |             |  |
|------|--------------|--------|-------------|-------------|--|
| A147 | 127.35(7.81) | 176.68 | 52.84(4.20) | 19.08(1.31) |  |
| K148 | 126.42(7.97) | 181.45 | 57.50       | 33.74       |  |
